# Supplementary material for: Epidemiology of Zika virus, 1947–2007
Source: PubMed Central journal article supplement — BMJ Glob Health. 2016 Aug 1;1(2):e000087. doi: 10.1136/bmjgh-2016-000087 (PMC5321352; doi:10.1136/bmjgh-2016-000087), 2016-08-01
Supplement: bmjgh-2016-000087supp_appendixA.pdf [file bmjgh-2016-000087supp_appendixA.pdf]

# Appendix A: Article selection flow diagram

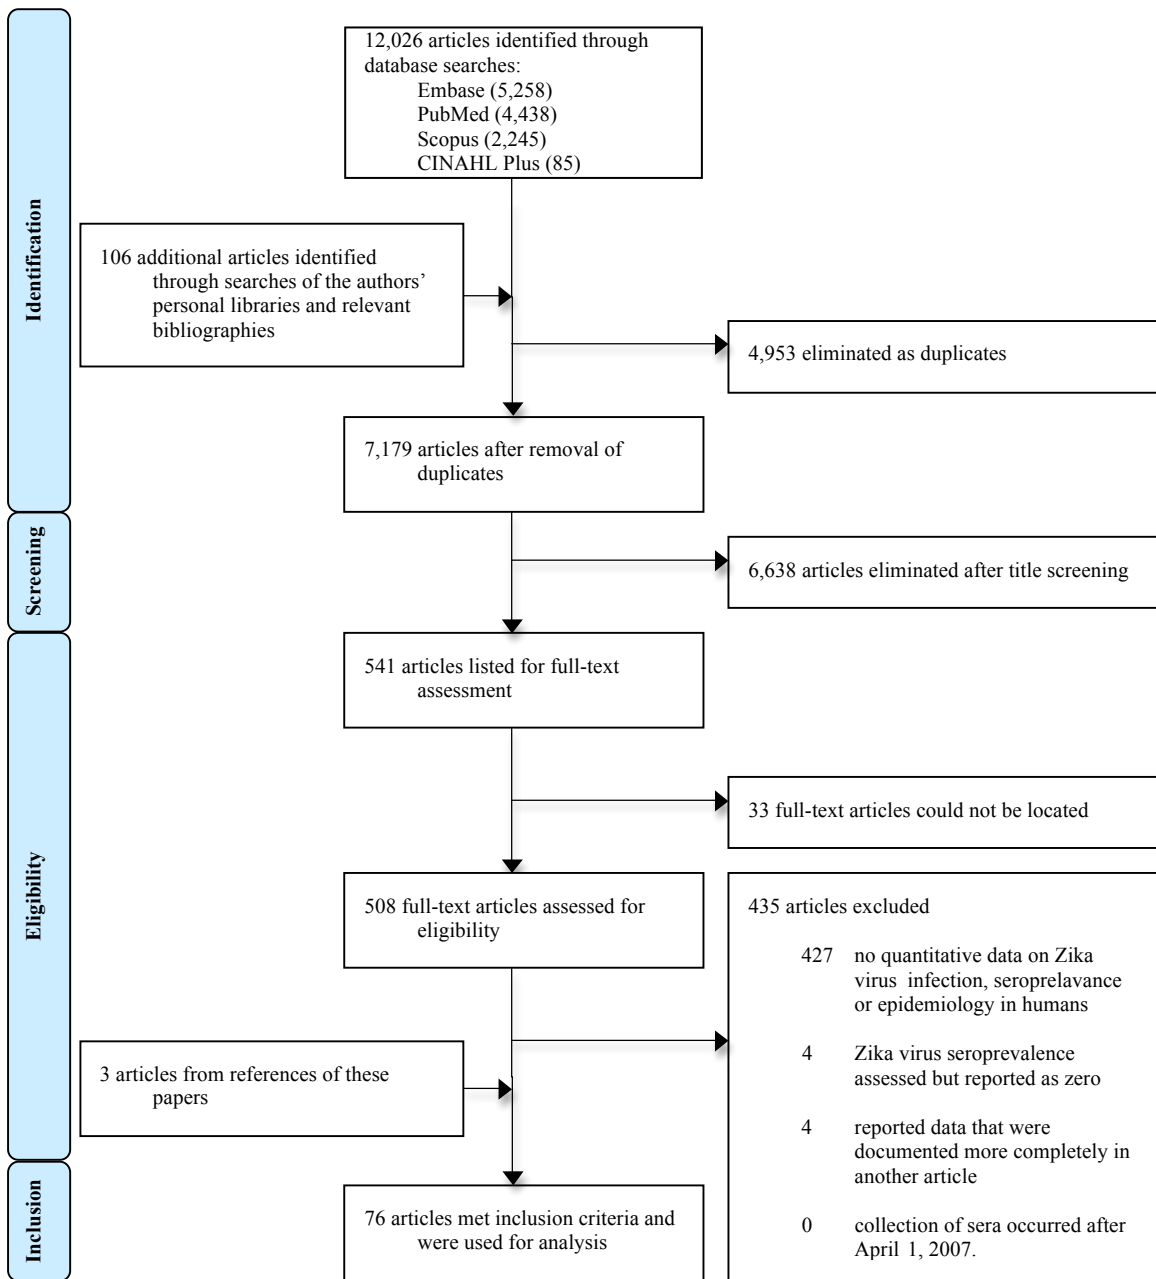

Flow diagram generated according to PRISMA:

Moher D, Liberati A, Tetzlaff J, Altman DG. Preferred reporting items for systematic reviews and meta-analyses: the PRISMA statement. *Ann Intern Med* 2009;151:264-9.
