# Supplementary material for: Epidemiology of Zika virus, 1947–2007
Source: PubMed Central journal article supplement — BMJ Glob Health. 2016 Aug 1;1(2):e000087. doi: 10.1136/bmjgh-2016-000087 (PMC5321352; doi:10.1136/bmjgh-2016-000087), 2016-08-01
Supplement: bmjgh-2016-000087supp_appendixB.pdf [file bmjgh-2016-000087supp_appendixB.pdf]

## **Appendix B: References of articles that could not be located**

1. Ari A. The prevalence and ecology of arboviruses in Turkey. *Turk Hij Den Biyol Derg* 1972;32:134-43.
2. Author Unknown. Rapport annuel 1998 du Centre collaborateur OMS de référence et de recherche pour les arbovirus, 1999.
3. Author Unknown. Rapport annuel 1978 du Centre collaborateur OMS de référence et de recherche pour les arbovirus (diffusion restreinte), 1979.
4. Bhardwaj M, Suri JC, Narain B. Serology of arboviral infections in cases of pyrexia of unknown origin. *J Comm Dis* 1980;12:167-8.
5. Brès P, Boiron H, Héry G, Le Noc D. Serologic investigation of arbovirus infections in eastern Senegal. *Dakar Med* 1965;10:412-3.
6. Butenko AM, Fabille A, Tomori O. Circulation of arboviruses in the area of Kaingy water reservoir (Nigeria) according to serological surveys. *Trud Inst Pol Vir Ents* 1974;22:245-51.
7. Carey DE, Rodrigues FM, Myers RM, Webb JK. Arthropod-borne viral infections in children in Vellore, South India, with particular reference to dengue and West Nile viruses. *Indian Pediatr* 1968;5:285-96.
8. Chakravarty SK, Chatterjee SN, Chakravarty MS, Sarkar JK. Survey for arbovirus antibodies in the human sera collected from Asansol. *Bull Calcutta Sch Trop Med* 1969;17:116-8.
9. Chaturvedi UC, Bahuguna LM, Mehrotra NK, Tandon HO, Mehrotra RM. Group B arbovirus HI antibodies in the human and animal sera at Lucknow. *Indian J Pathol Microbiol* 1976;19:161-7.
10. Darwish M, Hoogstraal H. Arboviruses infecting humans and lower animals in Egypt: a review of thirty years of research [1950-1980]. *J Egypt Public Health Assoc* 1981;56:1-112.
11. Darwish MA, Ibrahim AH. A serological survey on group A and B arbovirus antibodies in Libya. *J Egypt Public Health Assoc* 1974;49:20-6.
12. Enjalbert L, Didier J, Serie C, Lareng M, Theophile M. Enquête sérologique sur les arbovirus dans les Pyrénées Centrales. *Rev Med Toulouse* 1969;5:655-62.
13. Fabiyi A. Yellow fever at Tema, Ghana, 1959: a serological survey by complement fixation. *Ann Trop Med Parasitol* 1961;55:235-41.

14. Filipe AR. Serological survey for antibodies to arboviruses in the human population of Portugal. *Trans R Soc Trop Med Hyg* 1974;68:311-4.
15. Filipe AR, Oliveira AR, Arala Chaves M. Antibodies to arboviruses among the population of Luanda prior to the yellow fever epidemic of 1971. *J Soc Cienc Med Lisb* 1973;137:623-34.
16. Francis TI, Onukogu AI, Okafor EE. Clinical and epidemiological studies of an epidemic of jaundice in Aba and Onitsha, 1970. *W Afr Med J* 1972;21:43-6.
17. Fuentes LG, Mora JA. Serological survey on arboviruses in Costa Rica. *Rev Latinoam Microbiol* 1971;13:25-8.
18. Green IJ, Hurlbut HS, Yu HM. Arbovirus serological survey of Indonesians residing within a 50 Km. radius of Jakarta in 1963. *Chin J Microbiol* 1973;6:149-56.
19. Ibrahim SH, Darwish MA, Wahdan MH, El Ghoroury AAA. Survey for antibodies against group B arboviruses in man in Kuwait. *J Egypt Public Health Assoc* 1974;49:77-95.
20. Maheswaran K, Mendis NMP, Hermon YE, De La Motte PU. Serological survey of arbovirus infection in Sri Lanka. *Ceylon Med J* 1976;21:105-9.
21. Mukherjee KK, Chakravarty SK, Sarkar JK. Two year study of arbovirus infection amongst the boarders of two hostels in Calcutta. *Indian J Pathol Microbiol* 1977;20:169-73.
22. Oudar J, Joubert L. Les arboviroses humaines et animales: leurs incidences dans le Midi méditerranéen de la France. *Concours Méd* 1969;91:4051-64.
23. Papapanagiotou J, Kyriazopoulou V, Antoniadis A. Haemagglutination inhibiting antibodies to arboviruses in a human population in Greece. *Zbl Bakt Reihe A* 1974;228:443-6.
24. Ray S, Chakravarty MS, Chatterjee SN, et al. Survey of antibodies against arboviruses and vaccinia virus in the sera of a closed community in Calcutta. *Bull Calcutta Sch Trop Med* 1969;17:40-2.
25. Robin Y. Rapports annuels 1976-1977 du Centre collaborateur OMS de référence et de recherche pour les arbovirus, 1977-1978.
26. Sanna A, Fadda G, Chezzi C, Murruzzu I, Bagella G, Gelli GP. On the activity of arbovirus in various regions of Italy: (I) serologic research on the human population of the coast of Liguria (Imperia, La Spezia), the Po Valley (Parma, Mantova), Sardinia (Sassari). *Ig Mod* 1967;60:739-49.

27. Theiler M. A R Rockefeller Found Virus Lab 1961;55.
28. Tikasingh ES, Jonkers AH, Spence L, Davies JB, Aitken TH. Arbovirus studies in an evergreen seasonal marsh forest in Trinidad, West Indies. *West Indian Med* 1983;32:223-31.
29. Van Peenen PFD, See R, Soysa PE, Irving GS. Seroepidemiological survey of hospital associated populations in Colombo, Sri Lanka. *Southeast Asian J Trop Med Public Health* 1976;7:16-20.
30. Verani P, Ciufolini MG, Nicoletti L. Arbovirus surveillance in Italy. *Parassitologia* 1995;37:105-8.
31. Verani P, Lopes MC, Balducci M, Serra F, Crivaro G. Arbovirus investigations in southern Italy (Calabria). *J Hyg Epidemiol Microbiol Immunol* 1971;15:405-16.
32. Vesenjak Hirjan J, Galinovic Weisglass M. Occurrence of arboviruses in Bosnia and Herzegovina: serological investigations. *Acta Biol Jugosl Ser B* 1972;9:9-16.
33. Wisseman Jr CL. Sero-epidemiology of arboviruses among inhabitants of selected Pacific Islands. *Jpn J Med Sci Biol* 1967;20:170-2.
